# Supplementary material
Source: Springer Nature journal article supplement (https://www.springermedizin.de/resource/supplementary/12885_2012_3945_MOESM1_ESM.pdf/9464716)
Supplement: MOESM1 [file 9464716]

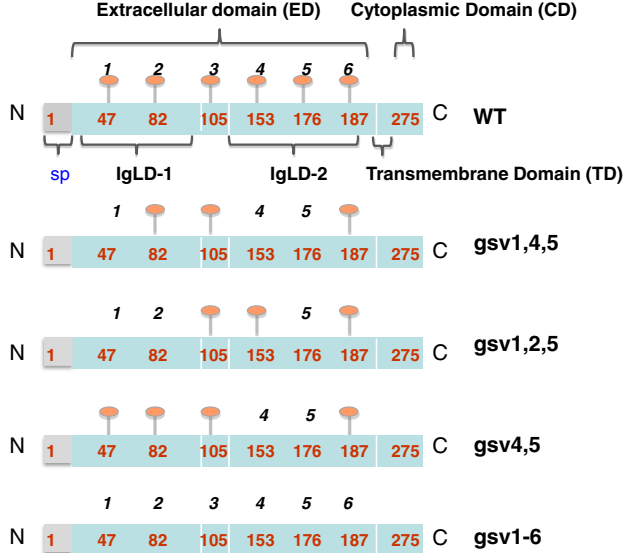

| <b>ICAM-2 construct</b> | <b>Amino acid mutation sites (numbered 1-6)<br/>1=47; 2=82; 3=105; 4=153; 5=176; 6=187)</b> | <b>Apparent Molecular Mass (kDa)</b> |
|-------------------------|---------------------------------------------------------------------------------------------|--------------------------------------|
| WT                      | None                                                                                        | 55-60                                |
| gsv1,4,5                | N47A, N153A, N176A                                                                          | 35-38                                |
| gsv1,2,5                | N47A, N82A, N176A                                                                           | 32-35                                |
| gsv4,5                  | N153A, N176A                                                                                | 40-45                                |
| gsv1-6                  | N47A, N82A, N105A, N153A, N176A, N187A                                                      | 30                                   |
